# Supplementary material for: Contextual Deprivation, Race and Ethnicity, and Income in Air Pollution and Cardiovascular Disease
Source: PubMed Central journal article supplement (PMC11333981; doi:10.1001/jamanetworkopen.2024.29137), 2024-08-19
Supplement: jamanetwopen-e2429137-s002.pdf [file jamanetwopen-e2429137-s002.pdf]

## Data Sharing Statement

Luo. Contextual Deprivation, Race and Ethnicity, and Income in Air Pollution and Cardiovascular Disease. *JAMA Netw Open*. Published August 19, 2024.

doi:10.1001/jamanetworkopen.2024.29137

### Data

**Data available:** Yes

**Data types:** Deidentified participant data

**How to access data:** All data can be accessed on the All of Us researcher workbench:

<https://www.researchallofus.org/register/>

**When available:** With publication

### Supporting Documents

**Document types:** Statistical/analytic code

**How to access documents:** All codes can be accessed on the All of Us researcher workbench: <https://www.researchallofus.org/register/>

**When available:** With publication

### Additional Information

**Who can access the data:** Anyone who is approved by the All of Us advisory committee

**Types of analyses:** All analyses can be accessed on the All of Us researcher workbench:

<https://www.researchallofus.org/register/>

**Mechanisms of data availability:** After approval by All of Us advisory committee
